# Supplementary material for: MXene/ZnO flexible freestanding film as a dendrite-free support in lithium metal batteries
Source: Royal Society of Chemistry journal article supplement (doi:10.1039/d2ta04797g), 2022-01-01
Supplement: d2ta04797g1.pdf [file d2ta04797g1.pdf]

*Electronic Supplementary Information*

**MXene/ZnO flexible freestanding film as dendrite-free support  
in lithium metal batteries**

Yuxi Shen, Ziyang Pu, Yaru Zhang, Yao Chen, Heng Zhang, Nating Wang, Hailong

Qiu\*, and Yueming Li\*

*State Key Laboratory of Metastable Materials Science and Technology, College of Materials Science and Engineering, Yanshan University, Qinhuangdao 066004, China E-mail: liyueming@ysu.edu.cn*

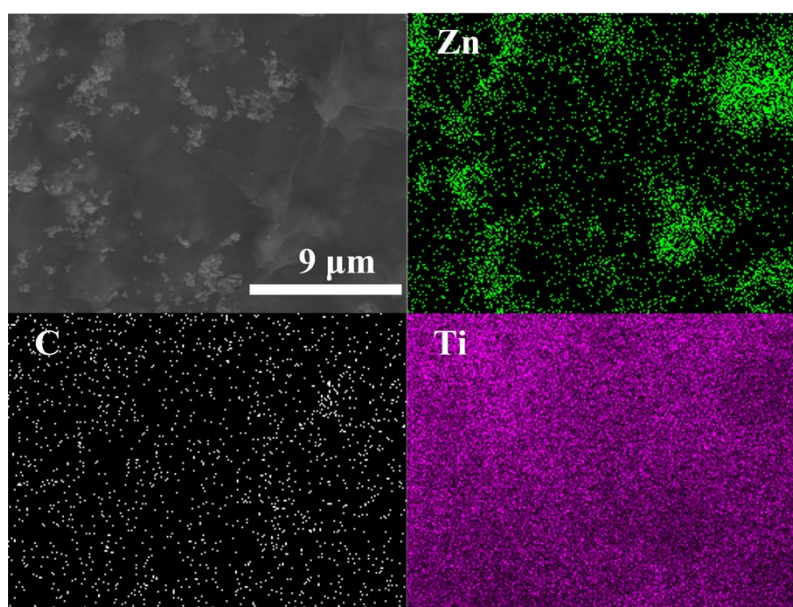

Figure S1 EDS mapping of top surface of MXene/ZnO substrate.

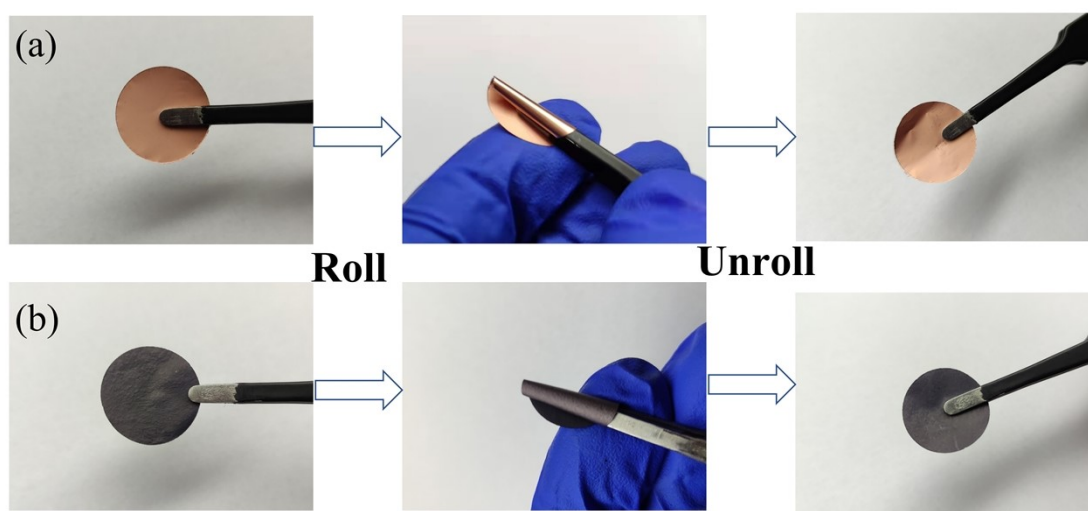

Figure S2 Optical images of roll and unroll of Cu and MXene/ZnO substrates.

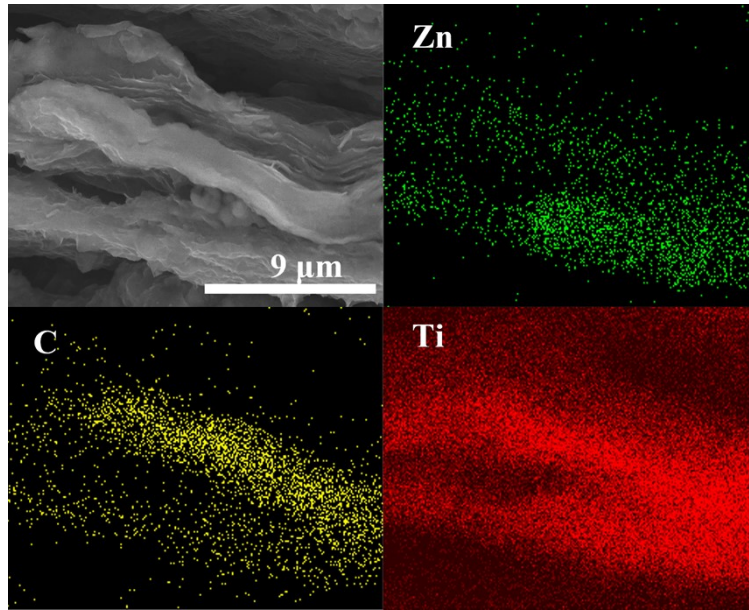

Figure S3 EDS mapping of cross-sectional surface of MXene/ZnO substrate.

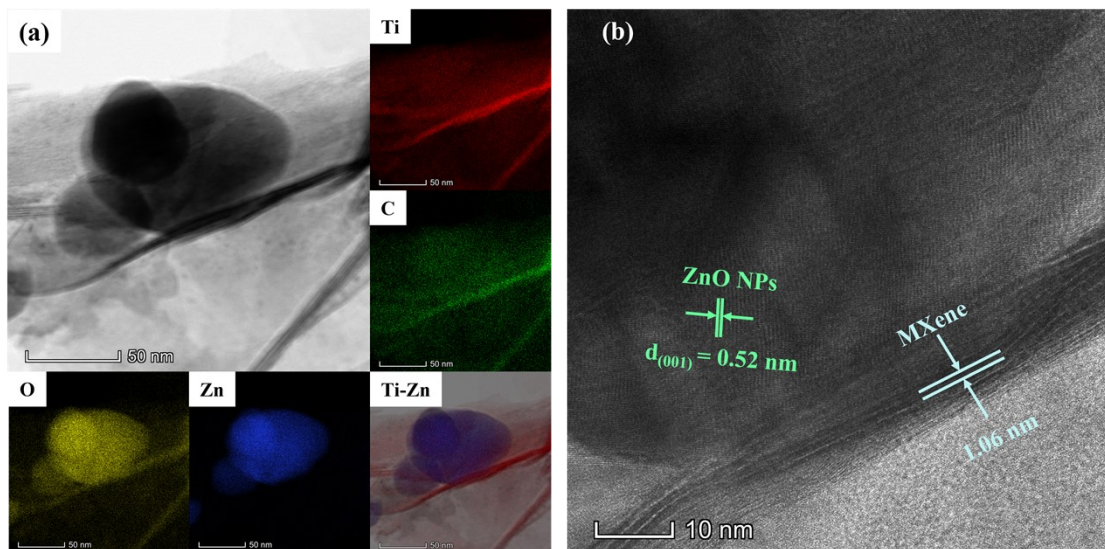

Figure S4 (a) TEM image of MXene/ZnO and corresponding elemental mapping, (b) HRTEM image of MXene/ZnO.

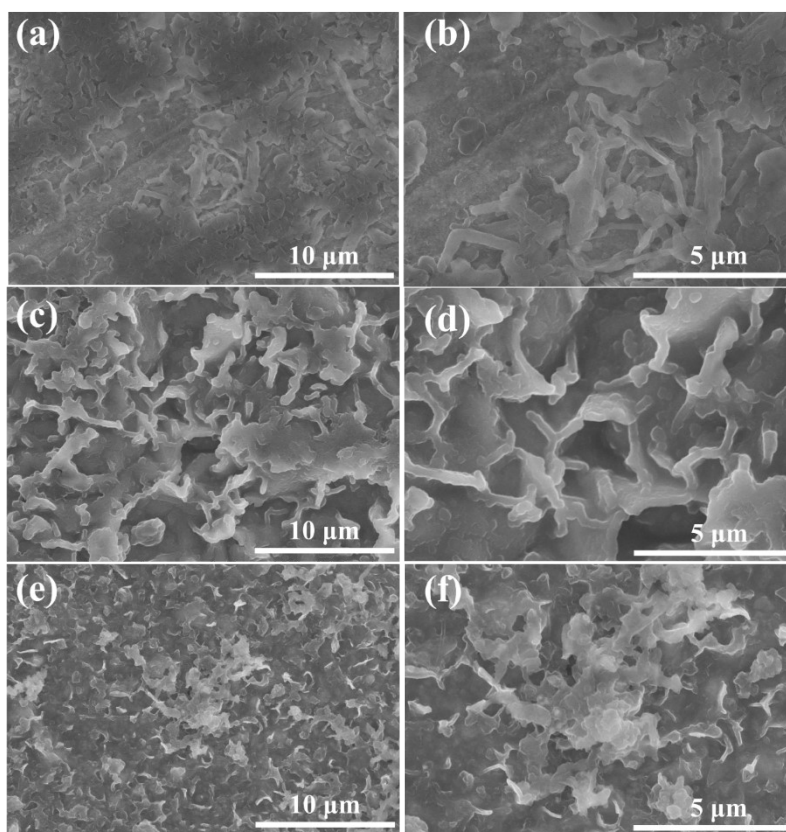

Figure S5 Morphologies of Li plating 0.2 mAh in Cu foil (a-b), MXene substrate (c-d), and MXene/ZnO (e-f).

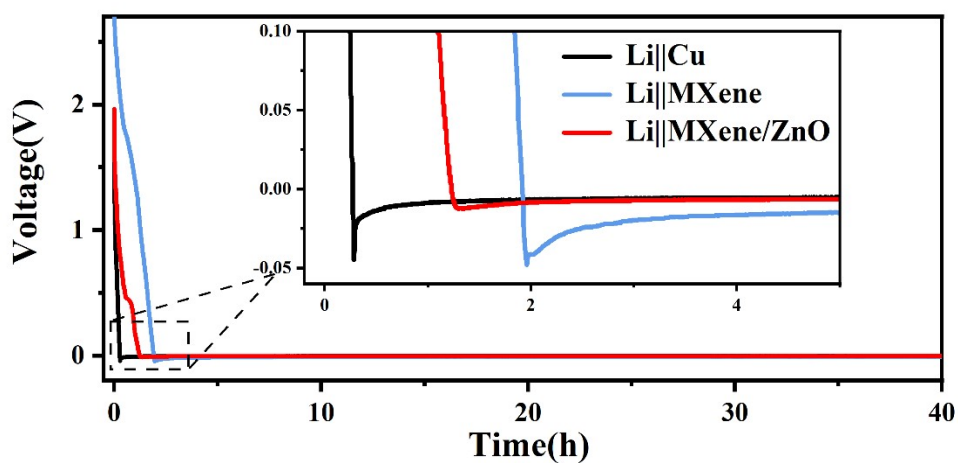

Figure S6 Voltage profiles of Li deposition on the Cu, MXene, and MXene/ZnO substrates at the current density of  $0.05 \text{ mA cm}^{-2}$ .



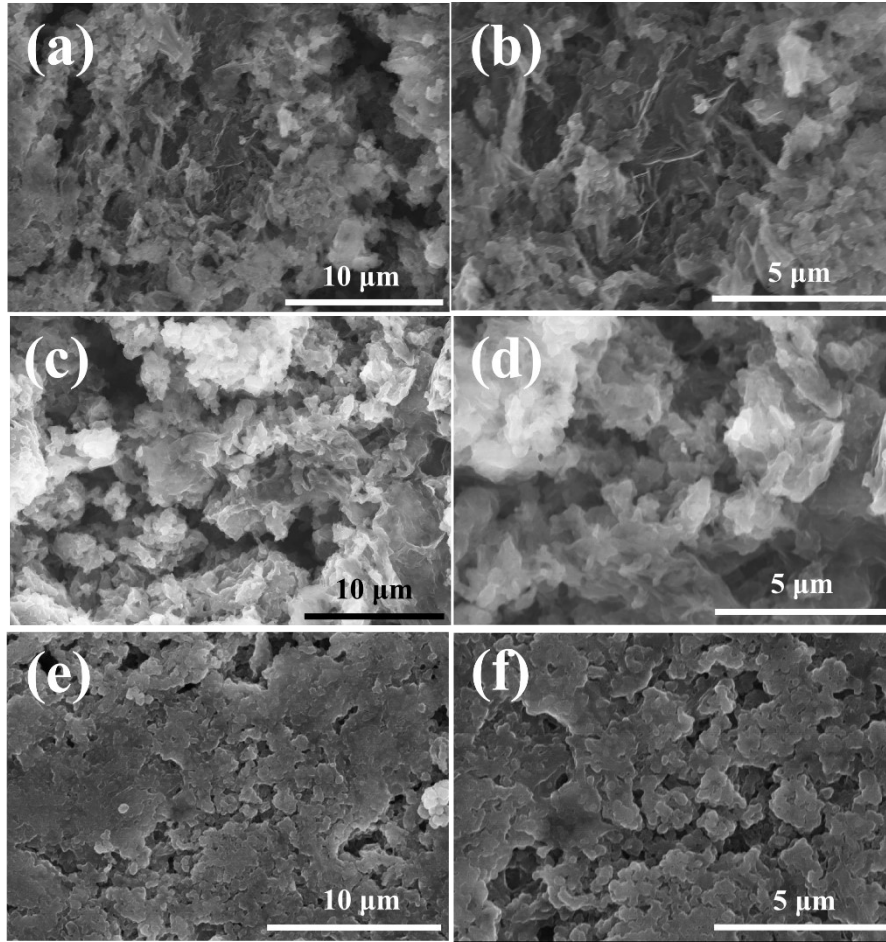

Figure S7 SEM images of Li stripping after 30 cycles (a-b) Cu, (c-d) MXene, and (e-f) MXene/ZnO substrate.

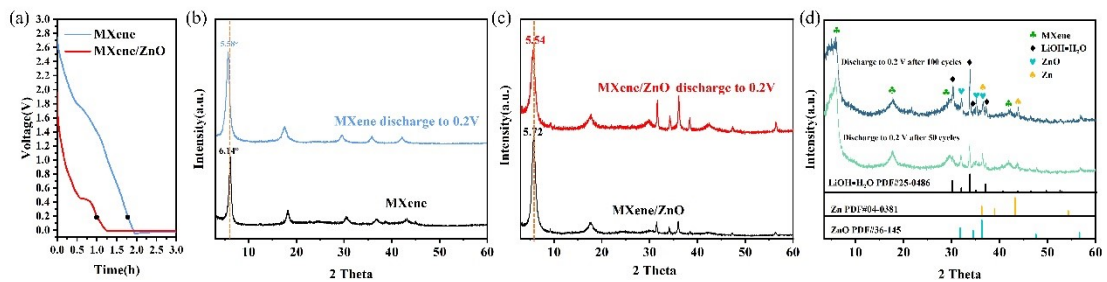

Figure S8 Discharge curves of Li||MXene and Li|| MXene/ZnO cell (a); XRD patterns of MXene (b); and MXene/ZnO (c) substrates when the half-cell was discharged to 0.2 V (vs Li/Li<sup>+</sup>). (d) XRD patterns of MXene/ZnO substrates when the half-cell was discharged to 0.2 V (vs Li/Li<sup>+</sup>) after 50 and 100 cycles at the current density of 3 mA cm<sup>-2</sup> and the capacity of 1 mAh cm<sup>-2</sup>.

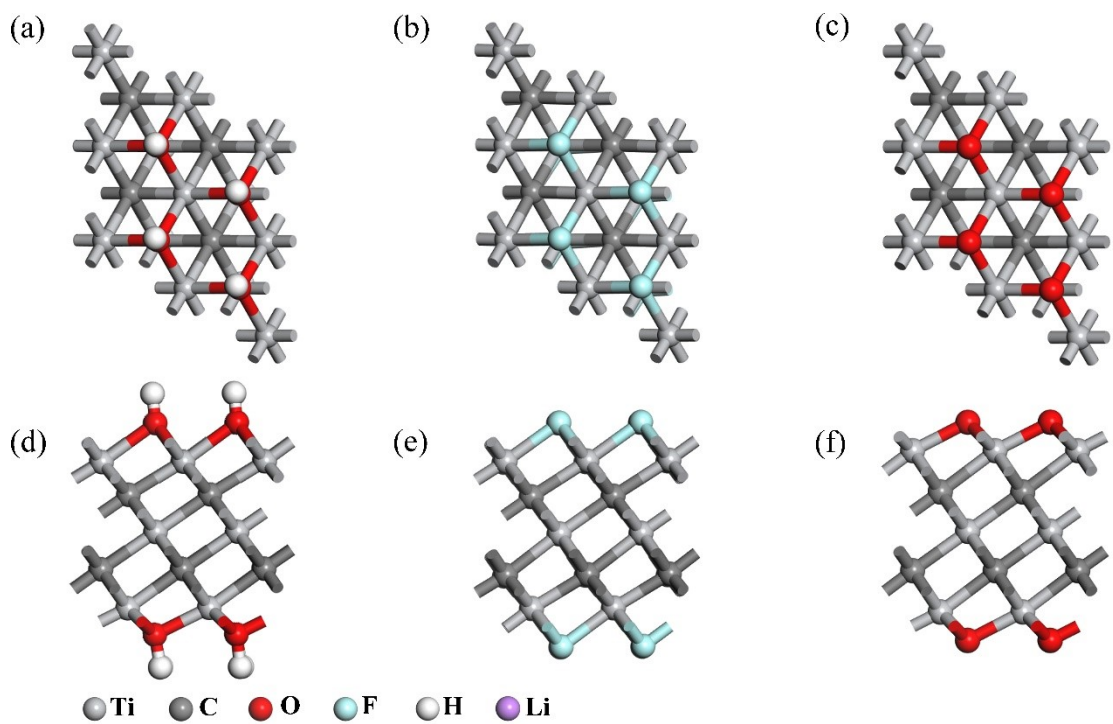

Figure S9 The top and side view of  $\text{Ti}_3\text{C}_2\text{T}_x$  with different terminating group.

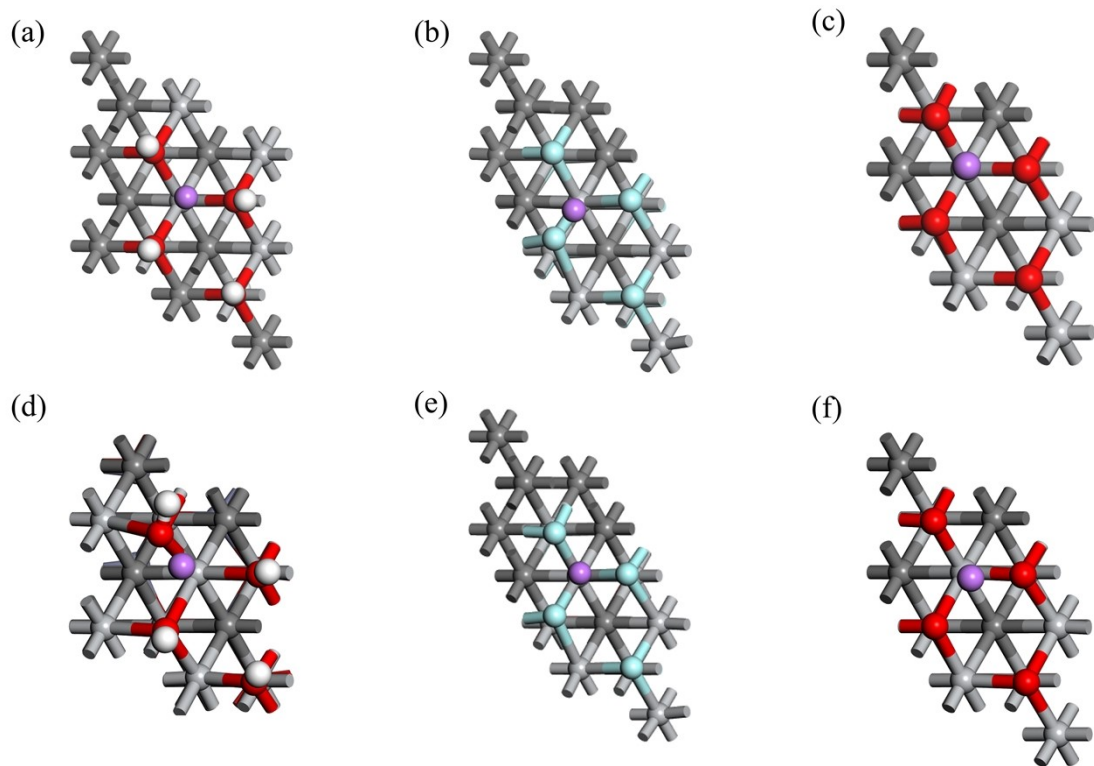

Figure S10 The top view of the optimized site of adsorbed Li on  $\text{Ti}_3\text{C}_2(\text{OH})_2$  (a),  $\text{Ti}_3\text{C}_2\text{F}_2$  (b),  $\text{Ti}_3\text{C}_2\text{O}_2$  (c),  $\text{Ti}_3\text{C}_2(\text{OH})_2@\text{ZnO}$  (d),  $\text{Ti}_3\text{C}_2\text{F}_2@\text{ZnO}$  (e), and  $\text{Ti}_3\text{C}_2\text{O}_2@\text{ZnO}$  (f).

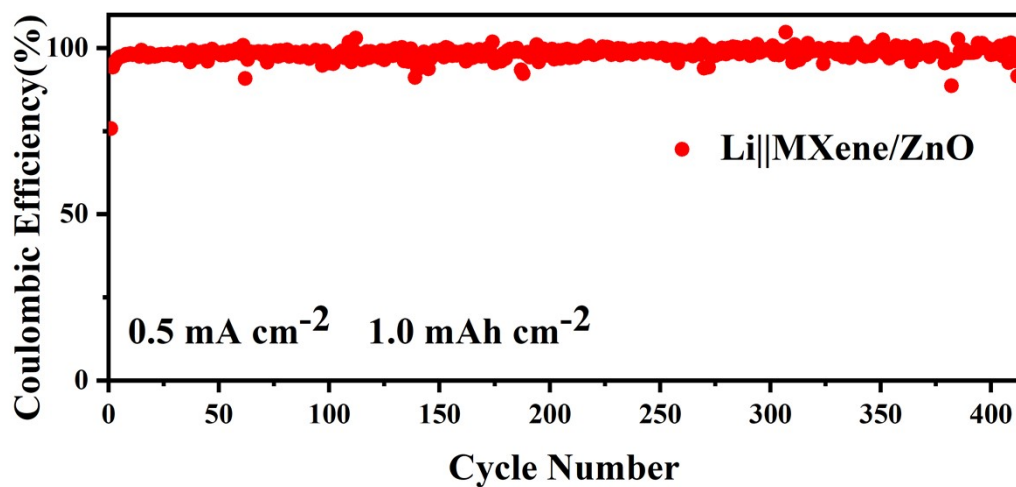

Figure S11 Cycling performance of repeated Li plating/stripping on MXene/ZnO at the current density of  $0.5 \text{ mA cm}^{-2}$

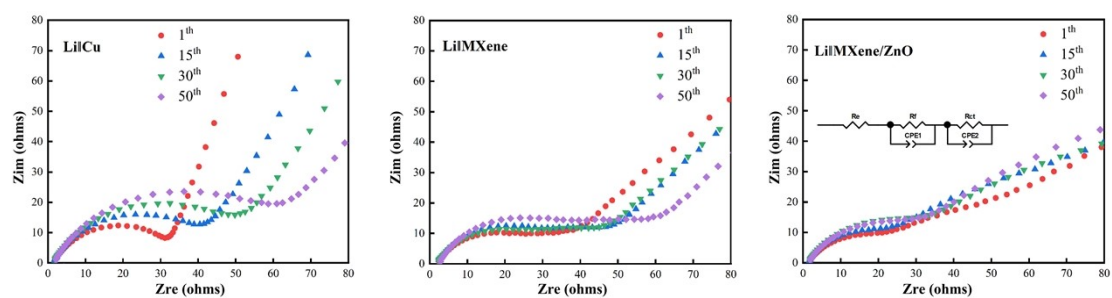

Figure S12 Nyquist plots and equivalent circuit diagram in Li || Cu (a), Li || MXene (b), and Li || MXene/ZnO (c) half-cells at different cycles.

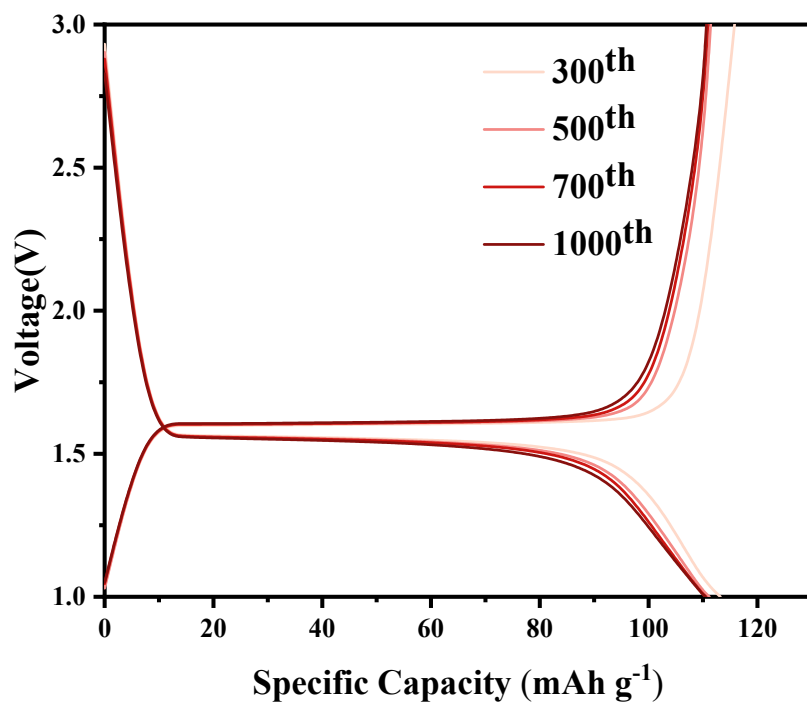

Figure S13 Galvanostatic charge-discharge profiles at 300<sup>th</sup>,500<sup>th</sup>,700<sup>th</sup> and 1000<sup>th</sup> of LTO || MXene/ZnO@Li full cell.

**Table S1** Comparison of the prepared current collector in Li metal half-cell

| Materials                                                             | Current density & Capacity                                               | Coulombic efficiency    | Cycling times     | Ref       |
|-----------------------------------------------------------------------|--------------------------------------------------------------------------|-------------------------|-------------------|-----------|
| <b>MXene/ZnO film</b>                                                 | 0.5mA cm <sup>-2</sup><br>1 mA cm <sup>-2</sup><br>3 mA cm <sup>-2</sup> | 98.3%<br>97.5%<br>96.0% | 410<br>330<br>150 | This work |
| <b>ZnO-CuZn mesh</b>                                                  | 1 mAcm <sup>-2</sup> ,<br>1 mAh cm <sup>-2</sup>                         | 97.48%                  | 100               | 1         |
| <b>ZnO in 3D conductive carbon nanofibers</b>                         | 1 mAcm <sup>-2</sup> ,<br>0.5 mAh cm <sup>-2</sup>                       | -                       | 200               | 2         |
| <b>ZnO/Carbon nanofibers</b>                                          | 1 mAcm <sup>-2</sup> ,<br>1 mAh cm <sup>-2</sup>                         | 89.8% to 98%            | 150               | 3         |
| <b>MXene@COFs</b>                                                     | 1 mAcm <sup>-2</sup> ,<br>2 mAh cm <sup>-2</sup>                         | ~ 99%                   | 300               | 4         |
| <b>MXene/Graphene farmework</b>                                       | 1 mAcm <sup>-2</sup> ,<br>2 mAh cm <sup>-2</sup>                         | -                       | 90                | 5         |
| <b>TiO<sub>2</sub> nanoparticles on Ti<sub>3</sub>C<sub>2</sub>Tx</b> | 0.2 mAcm <sup>-2</sup> ,<br>1 mAh cm <sup>-2</sup>                       | 95.4%                   | 100               | 6         |
| <b>Au@MXene</b>                                                       | 1 mAcm <sup>-2</sup> ,<br>1 mAh cm <sup>-2</sup>                         | 99%                     | 200               | 7         |
| <b>Au NPs in rGO</b>                                                  | 1 mAcm <sup>-2</sup> ,<br>1 mAh cm <sup>-2</sup>                         | 99.1%                   | 300               | 8         |
| <b>Supersized graphite carbon tubes (S-GCTs)</b>                      | 0.5 mAcm <sup>-2</sup> ,<br>1 mAh cm <sup>-2</sup>                       | -                       | 350               | 9         |
| <b>N, O co-doped carbon nanospheres</b>                               | 1 mAcm <sup>-2</sup> ,<br>1 mAh cm <sup>-2</sup>                         | 97.65 %                 | 275               | 10        |
| <b>Nitrogen-doped hollow porous carbon spheres</b>                    | 1 mAcm <sup>-2</sup> ,<br>1 mAh cm <sup>-2</sup>                         | 98.5 %                  | 270               | 11        |
| <b>TiN@Cu foam</b>                                                    | 1 mAcm <sup>-2</sup> ,<br>1 mAh cm <sup>-2</sup>                         | ~ 98 %                  | 300               | 12        |
| <b>Li<sub>2</sub>O on Cu foil</b>                                     | 0.25 mA cm <sup>-2</sup> ,<br>0.25 mAh cm <sup>-2</sup>                  | 97.8 %                  | 100               | 13        |
| <b>Li<sub>2</sub>S@Ni-Nickel foam</b>                                 | 1 mAcm <sup>-2</sup> ,<br>1 mAh cm <sup>-2</sup>                         | 98.1%                   | 100               | 14        |
| <b>Carbon paper/Sn/SnO composite</b>                                  | 1 mAcm <sup>-2</sup> ,<br>1 mAh cm <sup>-2</sup>                         | 98.8 %                  | 300               | 15        |
| <b>3D hierarchical porous Cu@Sn</b>                                   | 1 mAcm <sup>-2</sup> ,<br>1 mAh cm <sup>-2</sup>                         | 98 %                    | 240               | 16        |
| <b>Ultrathin TiO<sub>2</sub> on a Cu current collector</b>            | 1 mAcm <sup>-2</sup> ,<br>1 mAh cm <sup>-2</sup>                         | 97.4%                   | 100               | 17        |
| <b>Cu<sub>0.7</sub>Zn<sub>0.3</sub>/Cu foam</b>                       | 1.5 mAcm <sup>-2</sup> ,<br>1 mAh cm <sup>-2</sup>                       | 98%                     | 300               | 18        |
| <b>Oxygen vacancy-rich Co<sub>3</sub>O<sub>4</sub>/nickel foam</b>    | 1 mAcm <sup>-2</sup> ,<br>1 mAh cm <sup>-2</sup>                         | 98%                     | 200               | 19        |
| <b>3D porous poly-melamine formaldehyde (PMF)/Li</b>                  | 1 mA cm <sup>-2</sup> ,<br>1 mAh cm <sup>-2</sup>                        | 95.8%                   | 300               | 20        |



**Table S2** Comparison of the prepared current collector in lithium metal full cell

| Materials                                                                      | Cathode                                                   | Current density        | Cycling times | Capacity retention | Ref       |
|--------------------------------------------------------------------------------|-----------------------------------------------------------|------------------------|---------------|--------------------|-----------|
| MXene/ZnO film                                                                 | Li <sub>4</sub> Ti <sub>5</sub> O <sub>12</sub>           | 5 C                    | 1200          | 86.7 %             | This work |
| ZnO-CuZn mesh                                                                  | LiNi <sub>1/3</sub> Co <sub>1/3</sub> Mn <sub>1/3</sub> O | 1 C                    | 150           | 94.3 %             | 1         |
| ZnO in 3D conductive carbon nanofibers                                         | LiFePO <sub>4</sub>                                       | 1 C                    | 300           | 95.7 %             | 2         |
| MXene/Graphene framework                                                       | Li <sub>4</sub> Ti <sub>5</sub> O <sub>12</sub>           | 1 C                    | 450           | ~ 85 %             | 5         |
| Au@MXene                                                                       | LiFePO <sub>4</sub>                                       | 1 C                    | 200           | 97.7 %             | 7         |
| TiN@Cu foam                                                                    | Li <sub>4</sub> Ti <sub>5</sub> O <sub>12</sub>           | 2 C                    | 700           | 93.4 %             | 12        |
| 3D porous poly-melamine-formaldehyde (PMF)/Li                                  | Li <sub>4</sub> Ti <sub>5</sub> O <sub>12</sub>           | 2 C                    | 1000          | ~ 92%              | 20        |
| Ti <sub>3</sub> C <sub>2</sub> T <sub>x</sub> /g-C <sub>3</sub> N <sub>4</sub> | LiFePO <sub>4</sub>                                       | 0.5 C                  | 320           | 85.5 %             | 21        |
| In@Ti <sub>3</sub> C <sub>2</sub> T <sub>x</sub> paper                         | LiNi <sub>0.5</sub> Mn <sub>1.5</sub> O <sub>4</sub>      | 200 mA g <sup>-1</sup> | 130           | 80 %               | 22        |
| Vertically Aligned MXene Nanosheet                                             | LiFePO <sub>4</sub>                                       | 0.5 C                  | 350           | 85.4 %             | 23        |

(1 C = 0.175 mAg<sup>-1</sup> for Li<sub>4</sub>Ti<sub>5</sub>O<sub>12</sub>, 1 C = 0.17 mAg<sup>-1</sup> for LiFePO<sub>4</sub>, 1 C = 0.278 mAg<sup>-1</sup> for LiNi<sub>1/3</sub>Co<sub>1/3</sub>Mn<sub>1/3</sub>O).

## References

1. S. Huang, W. Zhang, H. Ming, G. Cao, L. Z. Fan and H. Zhang, *Nano Lett*, 2019, **19**, 1832-1837.
2. Y. Nan, S. Li, Y. Shi, S. Yang and B. Li, *Small*, 2019, **15**, e1903520.
3. Y. Wang, Z. Zhao, W. Zeng, X. Liu, L. Wang, J. Zhu and B. Lu, *J Energy Chem*, 2021, **58**, 292-299.
4. D. Guo, F. Ming, D. B. Shinde, L. Cao, G. Huang, C. Li, Z. Li, Y. Yuan, M. N. Hedhili, H. N. Alshareef and Z. Lai, *Adv Funct Mater*, 2021, **31**, 2101194.
5. H. Shi, C. J. Zhang, P. Lu, Y. Dong, P. Wen and Z. S. Wu, *ACS Nano*, 2019, **13**, 14308-14318.
6. Y. Yan, C. Shu, R. Zheng, M. Li, Z. Ran, M. He, L. Ren, D. Du and Y. Zeng, *J Energy Chem*, 2022, **65**, 654-665.
7. Y. Qian, C. Wei, Y. Tian, B. Xi, S. Xiong, J. Feng and Y. Qian, *Chem Eng J*, 2021, **421**, 129685.
8. W. Y. Diao, D. Xie, Y. F. Li, R. Jiang, F. Y. Tao, H. Z. Sun, X. L. Wu, X. Y. Zhang and J. P. Zhang, *Chem-Eur J*, 2021, **27**, 8168-8177.
9. W. Chen, Y. Hong, Z. Zhao, Y. Zhang, L. Pan, J. Wan, M. Nazir, J. Wang and H. He, *J Mater Chem A*, 2021, **9**, 16936-16942.
10. C. Gao, J. Li, K. Sun, H. Li, B. Hong, M. Bai, K. Zhang, Z. Zhang and Y. Lai, *Chem Eng J*, 2021, **412**, 128721.
11. W. Ye, F. Pei, X. Lan, Y. Cheng, X. Fang, Q. Zhang, N. Zheng, D. L. Peng and M. S. Wang, *Adv Energy Mater*, 2020, **10**, 1902956.

12. Y. Wang, W. Zhang, Y. Qi, S. Wang, P. Liu, X. Wei, Y. Yu, W. Sun, X.-Z. Zhao and Y. Liu, *J Alloy Compd*, 2021, **874**, 159916.
13. Z. Gong, C. Lian, P. Wang, K. Huang, K. Zhu, K. Ye, J. Yan, G. Wang and D. Cao, *Energ Environ Mater*, 2021, DOI: 10.1002/eem2.12243.
14. J. Zhang, Y. Zhou, F. Tu, Y. Ma, H. Zhang, D. Song, X. Shi and L. Zhang, *Chem Eng J*, 2022, **428**, 132510.
15. L. Tan, S. Feng, X. Li, Z. Wang, W. Peng, T. Liu, G. Yan, L. Li, F. Wu and J. Wang, *Chem Eng J*, 2020, **394**, 124848.
16. Z. Luo, C. Liu, Y. Tian, Y. Zhang, Y. Jiang, J. Hu, H. Hou, G. Zou and X. Ji, *Energy Storage Mater*, 2020, **27**, 124-132.
17. L. Tan, X. Li, T. Liu and X. Li, *J Power Sources*, 2020, **463**, 228157.
18. Y. Cheng, X. Ke, Y. Chen, X. Huang, Z. Shi and Z. Guo, *Nano Energy*, 2019, **63**, 103854.
19. Z. Wang, H. Shi, S. Yang, Z. Cai, H. Lu, L. Jia, M. Hu, H. He and K. Zhou, *J Alloy Compd*, 2021, **888**, 161553.
20. L. Fan, H. L. Zhuang, W. Zhang, Y. Fu, Z. Liao and Y. Lu, *Adv Energy Mater*, 2018, **8**, 1703360.
21. F. Zhao, P. Zhai, Y. Wei, Z. Yang, Q. Chen, J. Zuo, X. Gu and Y. Gong, *Adv Sci* 2022, **9**, e2103930.
22. Y. Qian, Y. An, Y. Zhang, C. Wei, B. Xi, S. Xiong and J. Feng, *J Power Sources*, 2022, **520**, 230901
23. Q. Chen, Y. Wei, X. Zhang, Z. Yang, F. Wang, W. Liu, J. Zuo, X. Gu, Y. Yao, X. Wang, F. Zhao, S. Yang and Y. Gong, *Adv Energy Mater*, 2022, **12**, 2200072
